# Supplementary material
Source: MDPI journal article supplement (https://www.mdpi.com/2073-4441/14/24/4014)
Supplement: s1 [file s1]

# Effects of Dam Building on Niche Differentiation of Comammox *Nitrospira* in the Main Stream of the Three Gorges Reservoir Area

Shuang Liu, Jiahui Zhang, Yuchun Wang, Mingming Hu, Yufei Bao, Shanze Li, Jie Wen and Jianwei Zhao

**Table S1.** Primer information table.

| Primer              | Primer Sequences(5'-3') | Target Genes   | Fragment Length |
|---------------------|-------------------------|----------------|-----------------|
| Arch- <i>amoA</i> F | STAATGGTCTGGCTTAGACG    | AOA            | 635 bp          |
| Arch- <i>amoA</i> R | GCGGCCATCCATCTGTATGT    |                |                 |
| <i>amoA</i> -1F9    | GGGGTTTCTACTGGTGGT      | AOB            | 491 bp          |
| <i>amoA</i> -2R5    | CCCCTCKGSAAAGCCTTCTTC   |                |                 |
| CA377f              | GTGGTGGTGGTCBAAYTA      | Comammox clade | 514 bp          |
| C576r               | GAAGCCCATRTARTCNGCC     | A              |                 |
| CB377f              | GTACTGGTGGGCBAAYTT      | Comammox clade | 514bp           |
| C576r               | GAAGCCCATRTARTCNGCC     | B              |                 |

**Table S2.** Physiochemical properties of Overlying water.

| Samples | pH   | Temp°C | ODO (mg/L) | Depth |
|---------|------|--------|------------|-------|
| M1      | 8.80 | 13.75  | 8.11       | 22.78 |
| M2      | 8.48 | 14.84  | 7.78       | 32.63 |
| M3      | 8.43 | 14.86  | 7.80       | 51.08 |
| M4      | 8.38 | 14.75  | 7.67       | 25.00 |
| M5      | 8.35 | 14.97  | 7.52       | 68.10 |
| M6      | 8.24 | 16.64  | 7.70       | 75.05 |
| M7      | 8.20 | 17.01  | 7.20       | 64.40 |
| M8      | 8.12 | 17.33  | 7.21       | 41.10 |
| M9      | 7.95 | 17.70  | 7.12       | 44.30 |

**Table S3.** Alpha diversity index table.

| Samples | Chao1    | Observed Species | Shannon  | 1/Simpson |
|---------|----------|------------------|----------|-----------|
| M1      | 2313.803 | 1023             | 6.000043 | 1.075822  |
| M2      | 3541.417 | 1488             | 7.077517 | 1.033667  |
| M3      | 3533.107 | 1421             | 6.796417 | 1.03883   |
| M4      | 3312.107 | 1359             | 7.09556  | 1.024485  |
| M5      | 3336.687 | 1330             | 6.9727   | 1.028216  |
| M6      | 3202.747 | 1343             | 6.71804  | 1.041933  |
| M7      | 2816.747 | 1162             | 6.225903 | 1.065936  |
| M8      | 2480.113 | 1073             | 6.277263 | 1.051573  |
| M9      | 2618.51  | 967              | 6.236127 | 1.044294  |

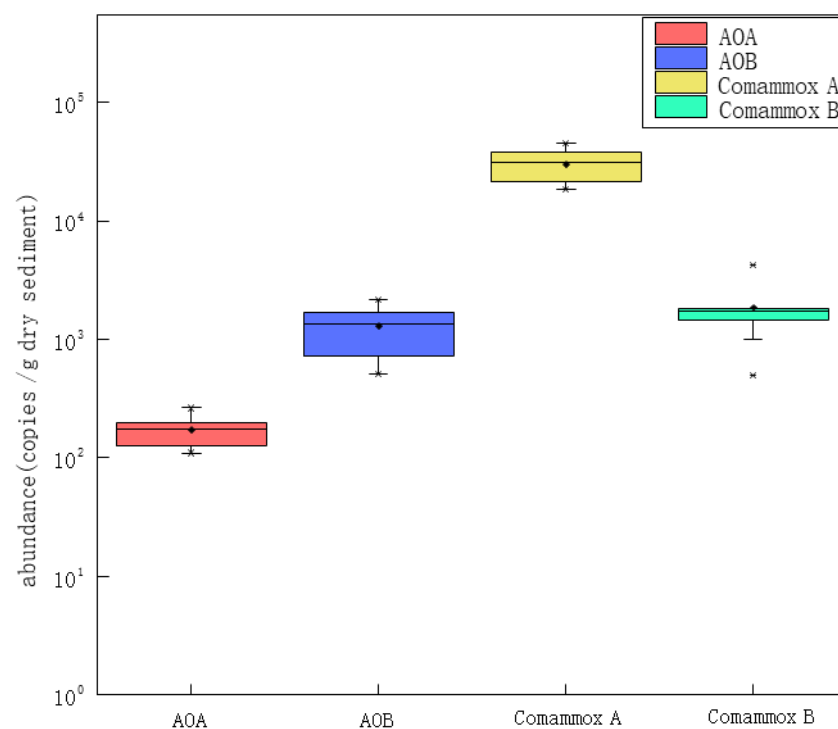

**Figure S1.** Total abundance of AOA, AOB, comammox clade A and comammox clade B *amoA* in samples.

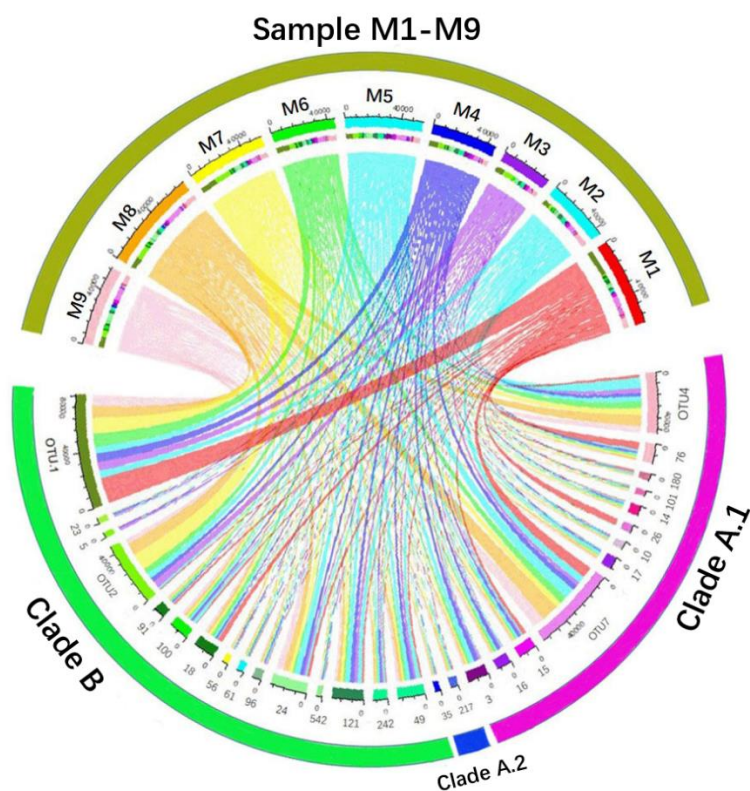

**Figure S2.** The distribution of 29 dominant OTUs at different sampling sites. The 9 sampling points and 29 OTUs are represented by different colors.

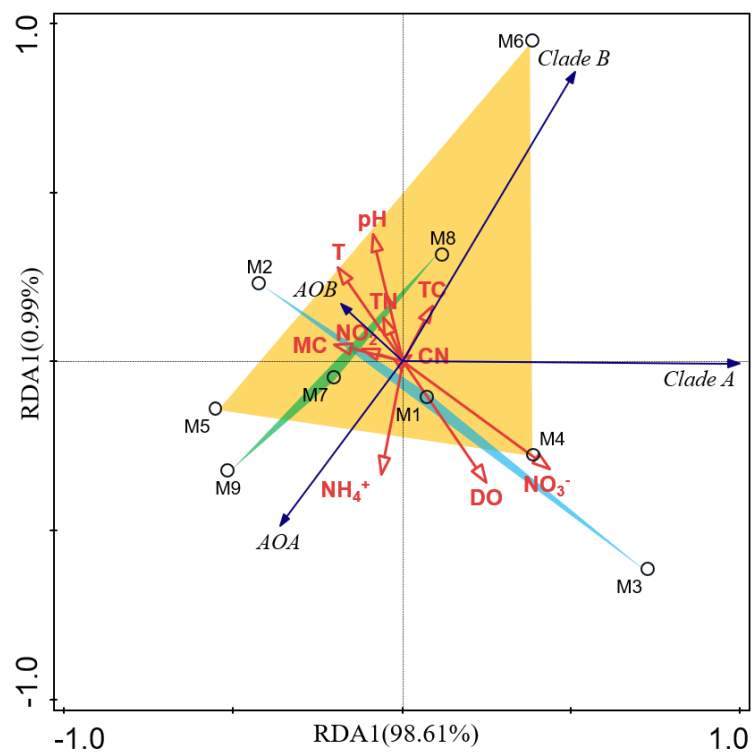

**Figure S3.** Redundancy analysis of comammox clade A, comammox clade B, AOA and AOB *amoA* abundances at sampling sites.
